# Supplementary material for: Novel Nongenetic Murine Model of Hyperglycemia and Hyperlipidemia-Associated Aggravated Atherosclerosis
Source: Frontiers journal article supplement (doi:10.3389/fcvm.2022.813215), 2022-03-08
Supplement: Data_Sheet_1.pdf [file Data_Sheet_1.pdf]

## Supplementary Material

### **Content:**

**Supplementary Table 1.** Characteristics of mice cohort.

**Supplementary Figure I.** PD fed HGHCi mice showed higher mortality than HFD fed mice.

**Supplementary Figure II.** Determination of the external and internal elastic lamina, lumen area and media area.

**Supplementary Figure III.** Comparison of aortic plaque score and total vessel lumen area.

**Supplementary Figure IV.** Intraplaque hemorrhage is not increased in HGHCi HFD mice.

**Supplementary Figure V.** Hyperglycemia alone does not affect plasma cholesterol levels in mice fed a Paigen diet.

**Major resources table**

**Supplementary Table 1. Characteristics of mice cohort.**

| <b>High-fat diet</b> | <b>Body weight [g]</b>  | <b>Liver weight [g]</b> | <b>Liver/body weight ratio</b> |
|----------------------|-------------------------|-------------------------|--------------------------------|
| <b>12 weeks</b>      |                         |                         |                                |
| Normal chow          | 31.8 ± 3.7 <sup>a</sup> | 1.5 ± 0.4 <sup>a</sup>  | 0.04                           |
| Saline HFD           | 40.4 ± 2.3              | 2.8 ± 0.5               | 0.06                           |
| HCi HFD              | 39.1 ± 3.3              | 2.6 ± 0.5               | 0.07                           |
| HGHCi HFD            | 24.7 ± 0.9 <sup>b</sup> | 2.8 ± 0.2               | 0.11                           |
| LDLR KO HFD          | 36.3 ± 5.5              | 2.1 ± 0.6               | 0.05                           |
| <b>20 weeks</b>      |                         |                         |                                |
| Normal chow          | 32.5 ± 2.8 <sup>a</sup> | 1.7 ± 0.1 <sup>a</sup>  | 0.05                           |
| Saline HFD           | 42.6 ± 4.8              | 3.0 ± 1.1 <sup>b</sup>  | 0.07                           |
| HCi HFD              | 45.3 ± 3.9 <sup>c</sup> | 4.1 ± 0.7 <sup>ac</sup> | 0.09                           |
| HGHCi HFD            | 27.3 ± 3.5 <sup>b</sup> | 2.7 ± 0.2 <sup>b</sup>  | 0.10                           |
| LDLR KO HFD          | 39.2 ± 3.4              | 3.2 ± 0.7 <sup>c</sup>  | 0.08                           |
| <b>Paigen diet</b>   |                         |                         |                                |
| <b>8 weeks</b>       |                         |                         |                                |
| Saline PD            | 31.1 ± 1.2              | 2.0 ± 0.1               | 0.06                           |
| HCi Paigen           | 32.0 ± 3.5              | 1.7 ± 0.2               | 0.05                           |
| HGHCi Paigen         | 19.7 ± 3.1 <sup>b</sup> | 2.7 ± 0.1 <sup>b</sup>  | 0.14                           |
| LDLR KO Paigen       | 27.9 ± 1.6 <sup>b</sup> | 1.6 ± 0.2               | 0.06                           |

**Supplementary Table 1.** Data are shown as mean ± SEM and statistical comparisons between the groups were calculated using the one-way ANOVA and Sidak's posthoc test. <sup>a</sup> p<0.05 vs Saline HFD/PD, <sup>b</sup> p<0.05 vs HCi HFD/PD, <sup>c</sup> p<0.05 vs 12 weeks. HFD: high-fat diet; HCi: hyperlipidemia model; HGHCi: hyperglycemia + hyperlipidemia model; PD: Paigen diet

**Supplementary Figure I. PD fed HGHCi mice showed higher mortality than HFD fed mice.**

**A**

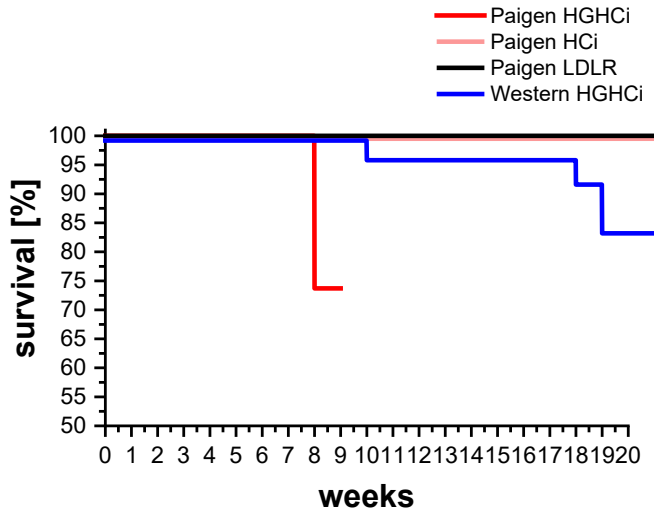

**Supplementary Figure I. A:** Kaplan-Meier survival curves of HGHCi, HCl and LDL receptor KO mice on Paigen diet compared to HGHCi mice on Western diet (high-fat diet, HFD).

**Supplementary Figure II. Determination of the external and internal elastic lamina, lumen area and media area.**

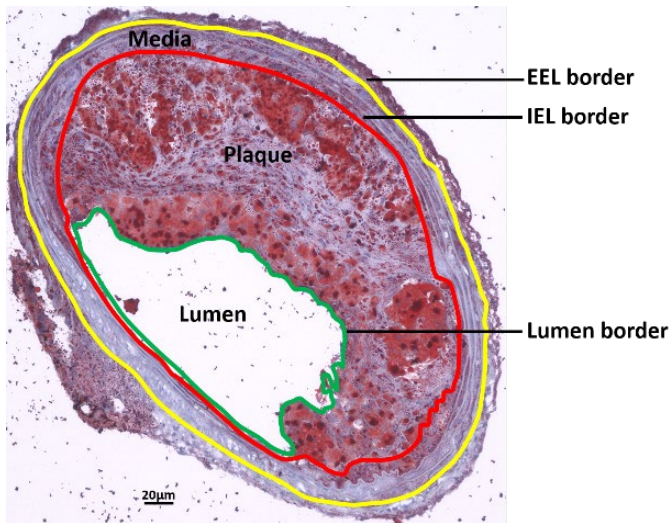

**Supplementary Figure II.** Representative image showing Oil-Red O stained BCA (**G**) for the measurement of the external elastic lamina (EEL, yellow line), internal elastic lamina (IEL, red line) and the lumen area (circled by a green line).

**Supplementary Figure III. Comparison of aortic plaque score and total vessel lumen area.**

**A**

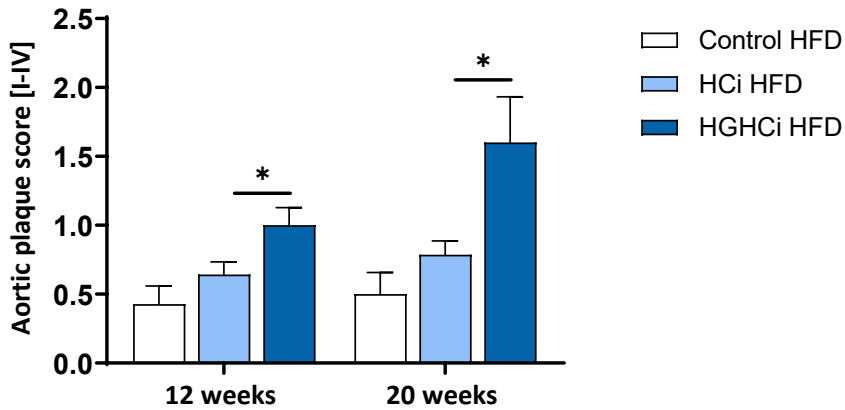

**B**

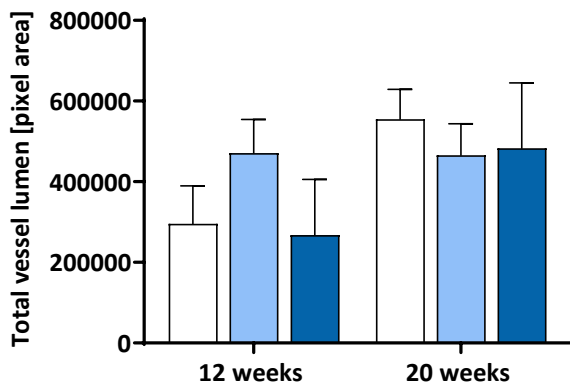

**Supplementary Figure III. A:** Aortic plaque score and total vessel lumen area [Pixel] of the truncus brachiocephalicus of HGHC and HCl mice on Western diet (high-fat diet, HFD) after 12 and 20 weeks. Aortic plaque score was determined as described below. 0= no lesions; 1= Lesions only in bifurcation; 2= like 1 + at least one long-stretch lesion; 3= like 1 + at least two long-stretch lesions; 4= like 1 + three to four long-stretch lesions

**Score of Aortic Arch Lesions**

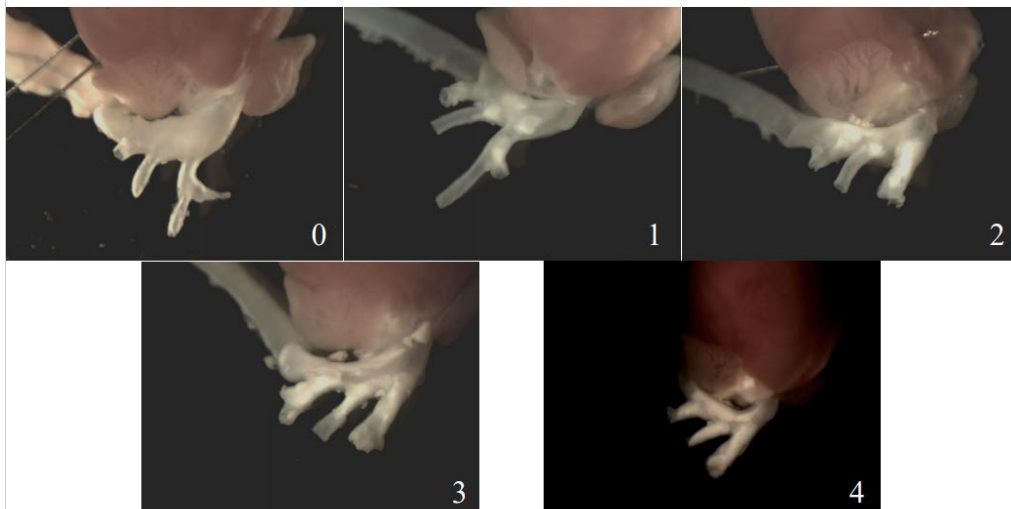

**Supplementary Figure IV.** Intraplaque hemorrhage is not increased in HGHCi HFD mice.

**A**

**Ter119**

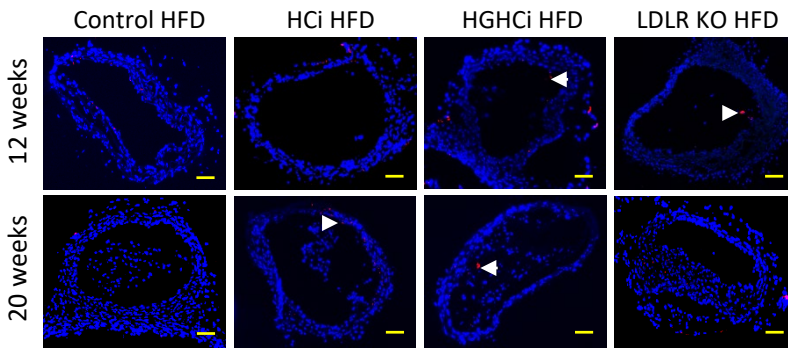

**Supplementary Figure IV. A:** Representative images showing immunofluorescence staining of truncus brachiocephalic arteries sections for hemorrhage marker Terr-119 (**A**, Terr-119= red; DAPI nuclear counterstain= blue, white arrows). Scale bar 200  $\mu$ m. Control 12 and 20 weeks (N= 7), HCl 12 weeks (N= 5) and 20 weeks (N= 6), HGHCi 12 weeks (N= 7) and 20 weeks (N= 6).

Control HFD: Wild type mice without rAAV8-PCSK9<sup>D377Y</sup> injection on high fat diet (HFD); HCl HFD: rAAV8-PCSK9<sup>D377Y</sup> injection plus HFD (hyperlipidemic); HGHCi HFD: rAAV8-PCSK9<sup>D377Y</sup> and streptozotocin injection and HFD (hyperlipidemic and hyperglycemic).

**Supplementary Figure V. Hyperglycemia alone does not affect plasma cholesterol levels in mice fed a Paigen diet.**

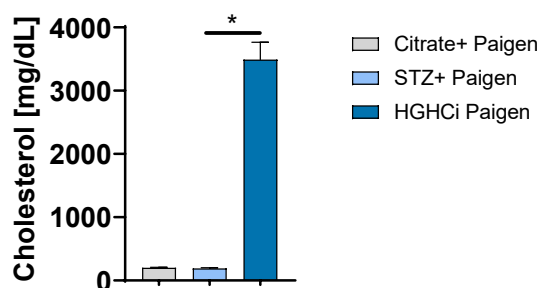

**Supplementary Figure V. Hyperglycemia alone does not affect plasma cholesterol levels in mice fed a Paigen diet.** Comparison of cholesterol levels in HGHCi mice (N=13), streptozotocin (STZ) treated mice (N=5) and citrate controls (N=3) fed with Paigen diet. Plasma cholesterol levels [mg/dL] were analyzed 12 weeks after induction of hyperglycemia with STZ.

## Major Resources Table

In order to allow validation and replication of experiments, all essential research materials listed in the Methods should be included in the Major Resources Table below. Authors are encouraged to use public repositories for protocols, data, code, and other materials and provide persistent identifiers and/or links to repositories when available. Authors may add or delete rows as needed.

### Animals (in vivo studies)

| Species | Vendor or Source           | Background Strain | Sex  | Persistent ID / URL                                                                           |
|---------|----------------------------|-------------------|------|-----------------------------------------------------------------------------------------------|
| Mouse   | Charles River Laboratories | C57BL/6N          | male | <a href="https://www.criver.com">C57BL/6 Mouse   Charles River Laboratories. (criver.com)</a> |
|         |                            |                   |      |                                                                                               |
|         |                            |                   |      |                                                                                               |

### Genetically Modified Animals

|                        | Species | Vendor or Source       | Background Strain  | Other Information                                | Persistent ID / URL                                                               |
|------------------------|---------|------------------------|--------------------|--------------------------------------------------|-----------------------------------------------------------------------------------|
| <b>Parent - Male</b>   | Mouse   | The Jackson Laboratory | 000664<br>C57BL/6J | B6.129S7-<br>Ldlrtm1Her/J<br>Stock No:<br>002207 | <a href="https://www.jax.org/strain/002207">https://www.jax.org/strain/002207</a> |
| <b>Parent - Female</b> | Mouse   | The Jackson Laboratory | 000664<br>C57BL/6J | B6.129S7-<br>Ldlrtm1Her/J<br>Stock No:<br>002207 | <a href="https://www.jax.org/strain/002207">https://www.jax.org/strain/002207</a> |

### Antibodies

| Target antigen   | Vendor or Source                    | Catalog # | Working concentration | Lot # (preferred but not required) | Persistent ID / URL                                                                                                                                                                                                                                                                                                                           |
|------------------|-------------------------------------|-----------|-----------------------|------------------------------------|-----------------------------------------------------------------------------------------------------------------------------------------------------------------------------------------------------------------------------------------------------------------------------------------------------------------------------------------------|
| mLDLR            | R&D System, United States           | AF2255    | 1:200                 |                                    | <a href="https://www.rndsystems.com/products/mouse-ldlr-antibody_af2255">https://www.rndsystems.com/products/mouse-ldlr-antibody_af2255</a>                                                                                                                                                                                                   |
| m $\beta$ -actin | Abcepta Inc., United States         | AM1829B   | 1:10,000              |                                    | <a href="https://www.abcepta.com/products/AM1829b-Beta-Actin-Antibody">https://www.abcepta.com/products/AM1829b-Beta-Actin-Antibody</a>                                                                                                                                                                                                       |
| Goat IgG HRP     | Agilent Technologies, United States | P0449     | 1:1,000               |                                    | <a href="https://www.agilent.com/store/en_US/LCatt-SubCat3ECS_244797/Rabbit-Anti-Goat-Immunoglobulins-HRP">https://www.agilent.com/store/en_US/LCatt-SubCat3ECS_244797/Rabbit-Anti-Goat-Immunoglobulins-HRP</a>                                                                                                                               |
| Mouse IgG HRP    | Agilent Technologies, United States | P0447     | 1:10,000              |                                    | <a href="https://www.agilent.com/en/product/immunohistochemistry/antibodies-controls/secondary-antibodies/goat-anti-mouse-immunoglobulins-hrp-(affinity-isolated)-153239">https://www.agilent.com/en/product/immunohistochemistry/antibodies-controls/secondary-antibodies/goat-anti-mouse-immunoglobulins-hrp-(affinity-isolated)-153239</a> |
| mMOMA-2          | abcam, Germany                      | ab33451   | 1:100                 |                                    | <a href="https://www.abcam.com/monocyte-macrophage-antibody-moma-2-ab33451.html">https://www.abcam.com/monocyte-macrophage-antibody-moma-2-ab33451.html</a>                                                                                                                                                                                   |



|                                                  |                                             |          |         |  |                                                                                                                                                                                                                                                   |
|--------------------------------------------------|---------------------------------------------|----------|---------|--|---------------------------------------------------------------------------------------------------------------------------------------------------------------------------------------------------------------------------------------------------|
| mCD68                                            | abcam,<br>Germany                           | ab125212 | 1:1,000 |  | <a href="https://www.abcam.com/cd68-antibody-ab125212.html">https://www.abcam.com/cd68-antibody-ab125212.html</a>                                                                                                                                 |
| Mouse alpha smooth muscle actin ( $\alpha$ -SMA) | abcam,<br>Germany                           | ab124964 | 1:250   |  | <a href="https://www.abcam.com/alpha-smooth-muscle-actin-antibody-epr5368-ab124964.html">https://www.abcam.com/alpha-smooth-muscle-actin-antibody-epr5368-ab124964.html</a>                                                                       |
| Rat IgG Alexa Fluor 568                          | ThermoFisher,<br>United States              | A-11077  | 1:100   |  | <a href="https://www.thermofisher.com/antibody/product/Goat-anti-Rat-IgG-H-L-Cross-Adsorbed-Secondary-Antibody-Polyclonal/">https://www.thermofisher.com/antibody/product/Goat-anti-Rat-IgG-H-L-Cross-Adsorbed-Secondary-Antibody-Polyclonal/</a> |
| anti-rabbit HRP                                  | Vector Laboratories, Inc.,<br>Unites States | MP-7801  |         |  | <a href="https://vectorlabs.com/immpress-horse-anti-rabbit-igg-plus-polymer-kit-peroxidase.html">https://vectorlabs.com/immpress-horse-anti-rabbit-igg-plus-polymer-kit-peroxidase.html</a>                                                       |

### DNA/cDNA Clones

| Clone Name | Sequence | Source / Repository | Persistent ID / URL |
|------------|----------|---------------------|---------------------|
|            |          |                     |                     |
|            |          |                     |                     |
|            |          |                     |                     |

### Cultured Cells

| Name | Vendor or Source | Sex (F, M, or unknown) | Persistent ID / URL |
|------|------------------|------------------------|---------------------|
|      |                  |                        |                     |
|      |                  |                        |                     |
|      |                  |                        |                     |

### Data & Code Availability

| Description | Source / Repository | Persistent ID / URL |
|-------------|---------------------|---------------------|
|             |                     |                     |
|             |                     |                     |
|             |                     |                     |

### Other

| Description                                                    | Source / Repository                | Persistent ID / URL |
|----------------------------------------------------------------|------------------------------------|---------------------|
| BCA reagent                                                    | Perbio Science, Germany            |                     |
| Vectashield mounting medium with DAPI                          | Vector Laboratories, United States |                     |
| Nitrocellulose membrane                                        | Bio-Rad, USA                       |                     |
| Immobilon <sup>TM</sup> western chemiluminescent HRP substrate | Merck, Millipore, United States    |                     |
| Streptozotocin                                                 | Enzo Life Sciences, Germany        |                     |
| Oil-Red O                                                      | Sigma-Aldrich, Germany             |                     |
| Accu-chek test strips                                          | Roche Diagnostics, Germany         |                     |
| Accu-check glucometer                                          | Roche Diagnostics, Germany         |                     |
| Protease inhibitor cocktail                                    | Roche Diagnostics, Germany         |                     |
| Albumin fraction V                                             | Carl ROTH, Germany                 |                     |
| Hematoxylin Gill II                                            | Carl ROTH, Germany                 |                     |

DOI [to be added]

|                         |                            |  |
|-------------------------|----------------------------|--|
| Acrylamide              | Carl ROTH, Germany         |  |
| Agarose                 | Carl ROTH, Germany         |  |
| Aqueous mounting medium | ZYTOMED, Germany           |  |
| High fat diet           | Ssniff, Germany            |  |
| PBS                     | Life Technologies, Germany |  |
| Rompun                  | Bayer, Germany             |  |
| Ketamine                | Beta-pharm, Germany        |  |
|                         |                            |  |
